# Supplementary material for: NiFe double hydroxide coated on sulfur-modified NiMoO4 nanorods as core–shell structured catalysts for the oxygen evolution reaction
Source: Royal Society of Chemistry journal article supplement (doi:10.1039/d2se01368a), 2022-01-01
Supplement: d2se01368a1.pdf [file d2se01368a1.pdf]

# NiFe double hydroxide coated on sulfur-modified NiMoO<sub>4</sub> nanorods as core-shell structured catalysts for oxygen evolution reaction

Mengyang Li <sup>a</sup>, Mingyi Zhang <sup>a,\*</sup>, Xin Chang<sup>a</sup>, Xinyao Ding<sup>a</sup> and Jingbo Mu <sup>b,\*</sup>

*1 Key Laboratory for Photonic and Electronic Bandgap Materials, Ministry of Education, School of Physics and Electronic Engineering, Harbin Normal University, Harbin 150025, People's Republic of China.*

*2 Key Laboratory of New Inorganic Nonmetallic Composite of Handan, College of Materials Science and Engineering, Hebei University of Engineering, Handan, 056038, China*

*\*Corresponding author: Email: zhangmingyi@hrbnu.edu.cn (M.Y. Zhang)*

Table S1 The overpotentials of NiFe LDH@S-NiMoO<sub>4</sub> are compared with related catalytic electrodes in 1 M KOH electrolyte solution.

| Catalysts                                                                                                         | Current density         | Overpotential | Ref. |
|-------------------------------------------------------------------------------------------------------------------|-------------------------|---------------|------|
| CoP <sub>3</sub> /NiMoO <sub>4</sub> heterostructures on Ni foam                                                  | 10 mA cm <sup>-2</sup>  | 347 mV        | (1)  |
| Fe-doped NiMoO <sub>4</sub>                                                                                       | 10 mA cm <sup>-2</sup>  | 299 mV        | (2)  |
| FeOOH modified NiMoO <sub>4</sub> nanowires                                                                       | 100 mA cm <sup>-2</sup> | 253 mV        | (3)  |
| Fe-S-NiMoO <sub>4</sub> / MoO <sub>3</sub> on Ni foam                                                             | 100 mA cm <sup>-2</sup> | 249 mV        | (4)  |
| N-NiMoO <sub>4</sub> /NiS <sub>2</sub> Nanowires/Nanosheets                                                       | 10 mA cm <sup>-2</sup>  | 283 mV        | (5)  |
| Ni <sub>9</sub> S <sub>8</sub> /MoS <sub>2</sub> Nanosheets Decorated NiMoO <sub>4</sub> Nanorods                 | 10 mA cm <sup>-2</sup>  | 360 mV        | (6)  |
| NiFe <sub>2</sub> O <sub>4</sub> /NiMoO <sub>4</sub> Nanorods on Ni foam                                          | 50 mA cm <sup>-2</sup>  | 270 mV        | (7)  |
| NiMoO <sub>4</sub> @Co <sub>3</sub> O <sub>4</sub> Core-Shell Nanorods                                            | 100 mA cm <sup>-2</sup> | 282 mV        | (8)  |
| Core/shell -structured NiMoO <sub>4</sub> @ MoSe <sub>2</sub> /Ni <sub>x</sub> Se <sub>y</sub> Nanorod on Ni Foam | 10 mA cm <sup>-2</sup>  | 290 mV        | (9)  |
| P/NiFe doped NiMoO <sub>4</sub> micro-pillars arrays                                                              | 100 mA cm <sup>-2</sup> | 360 mV        | (10) |
| P-doped Ni(OH) <sub>2</sub> /NiMoO <sub>4</sub> hierarchical nanosheet arrays grown on Ni foam                    | 100 mA cm <sup>-2</sup> | 380 mV        | (11) |
| Oxygen vacancy enriched NiMoO <sub>4</sub> nanorods                                                               | 50 mA cm <sup>-2</sup>  | 255 mV        | (12) |
| Ce-Doped Ni-S nanosheets on Ni foam supported NiMoO <sub>4</sub> micropillars                                     | 100 mA cm <sup>-2</sup> | 244 mV        | (13) |
| NiMoO <sub>4</sub> /NiFe LDH/rGO multicomponent nanosheets                                                        | 10mA cm <sup>-2</sup>   | 270 mV        | (14) |
| NiFe <sub>2</sub> O <sub>4-x</sub> /NiMoO <sub>4</sub> nanowire arrays on Ni Foam                                 | 600 mA cm <sup>-2</sup> | 326 mV        | (15) |
| Crystalline-Amorphous Ni <sub>2</sub> P <sub>4</sub> O <sub>12</sub> /NiMoO <sub>x</sub> Nanoarrays               | 20 mA cm <sup>-2</sup>  | 250 mV        | (16) |
| This work                                                                                                         | 100 mA cm <sup>-2</sup> | 277mV         |      |

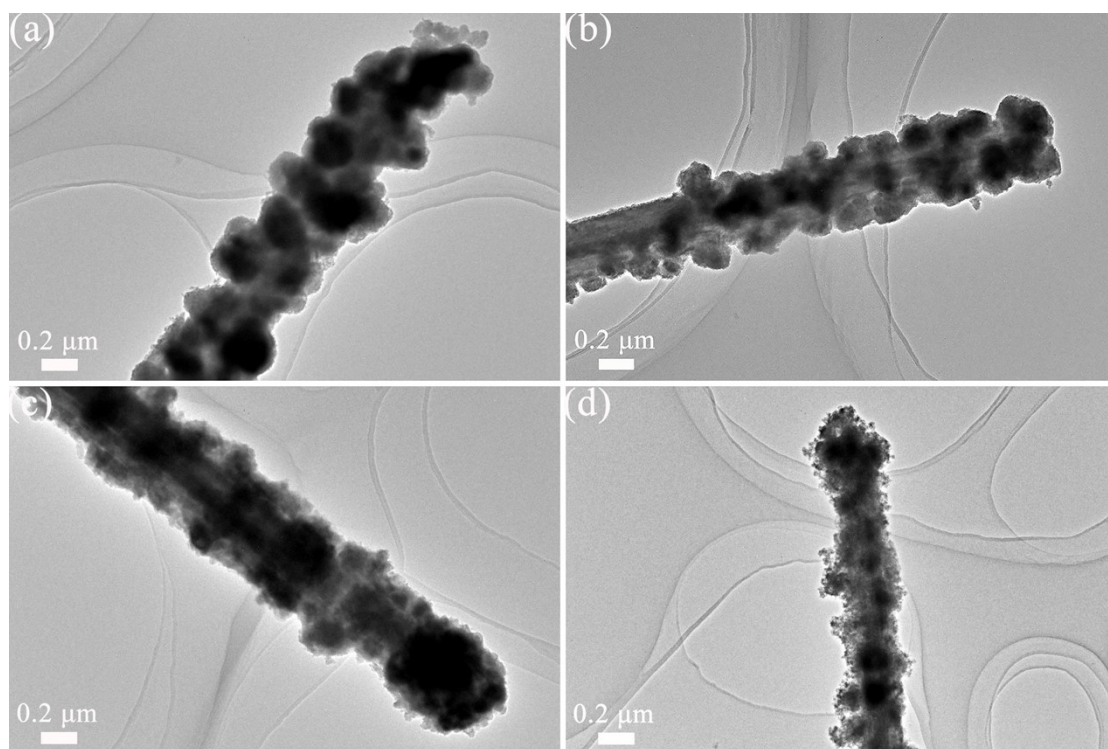

Fig. S1 TEM images (a-d) of NiFe LDH<sub>30min</sub>@S-NiMoO<sub>4</sub>, NiFe LDH@S-NiMoO<sub>4</sub>, NiFe LDH<sub>50min</sub>@S-NiMoO<sub>4</sub> and NiFe LDH<sub>60min</sub>@S-NiMoO<sub>4</sub>.

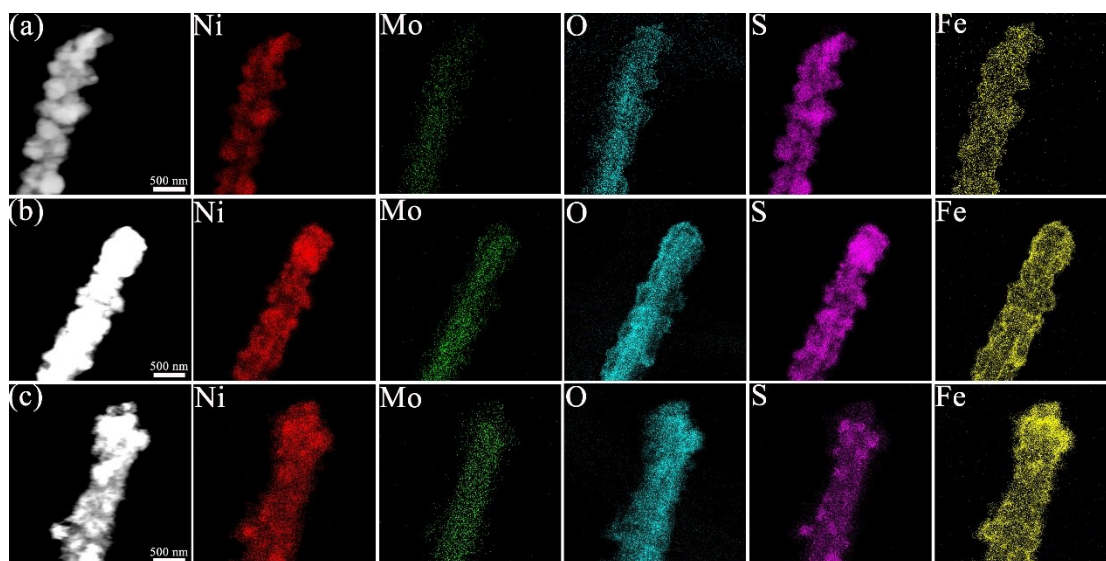

Fig. S2 EDS mapping images (a-c) of NiFe LDH<sub>30min</sub>@S-NiMoO<sub>4</sub>, NiFe LDH<sub>50min</sub>@S-NiMoO<sub>4</sub> and NiFe LDH<sub>60min</sub>@S-NiMoO<sub>4</sub>.

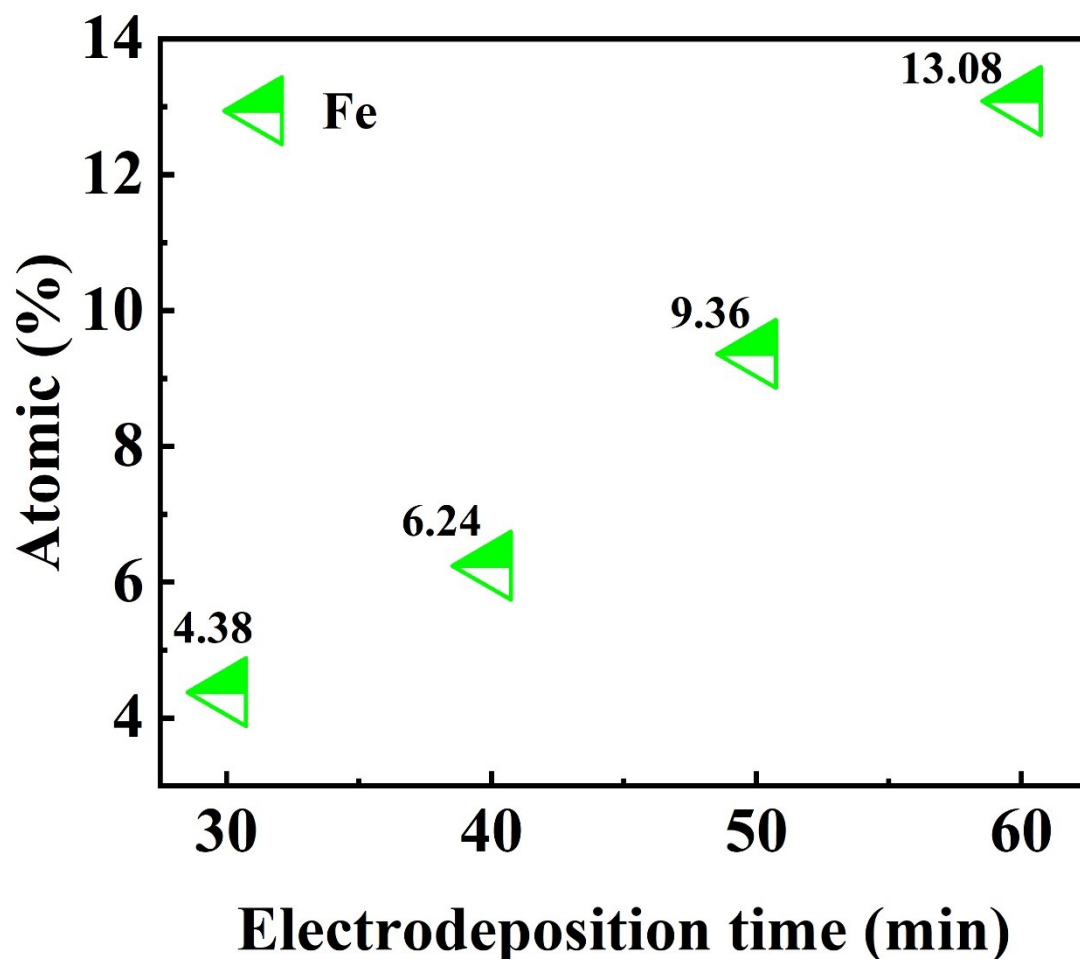

Fig. S3 Atomic specific gravity of Fe element at different times of electrodeposition.

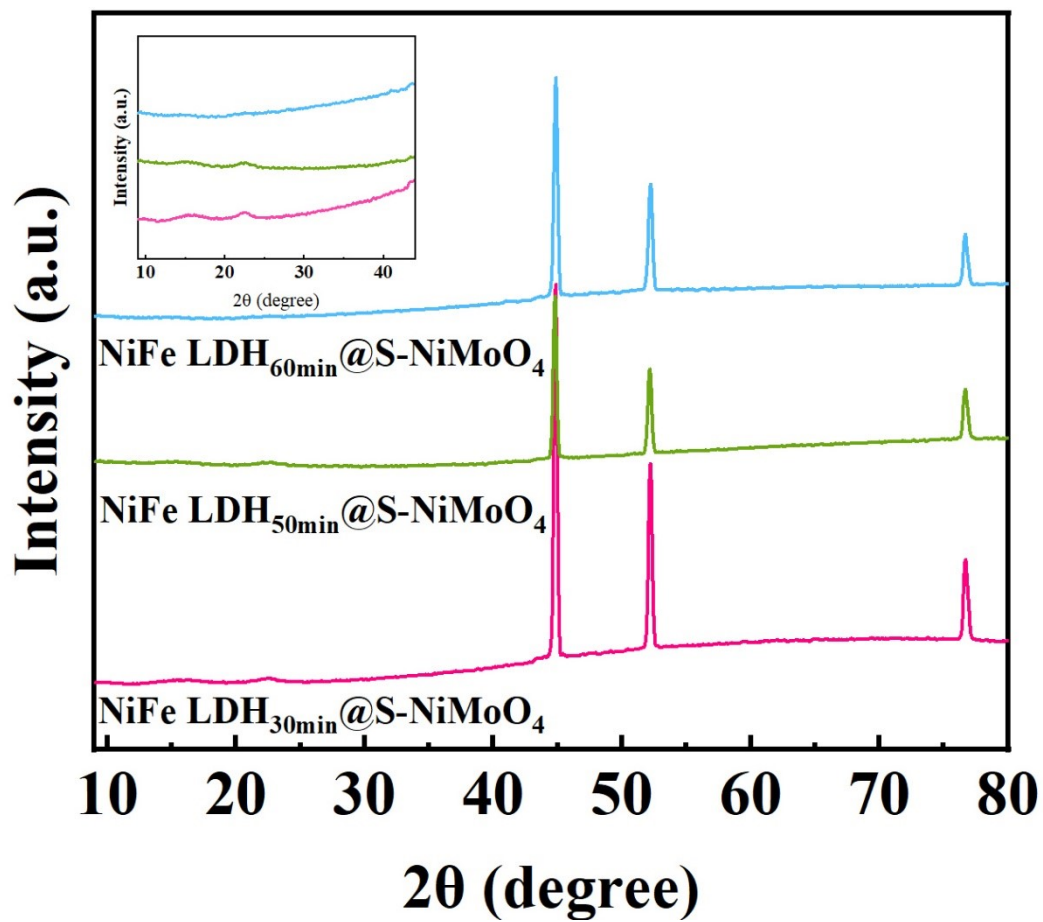

Fig. S4 XRD patterns of NiFe LDH<sub>30min</sub>@S-NiMoO<sub>4</sub>, NiFe LDH<sub>50min</sub>@S-NiMoO<sub>4</sub> and NiFe LDH<sub>60min</sub>@S-NiMoO<sub>4</sub>.

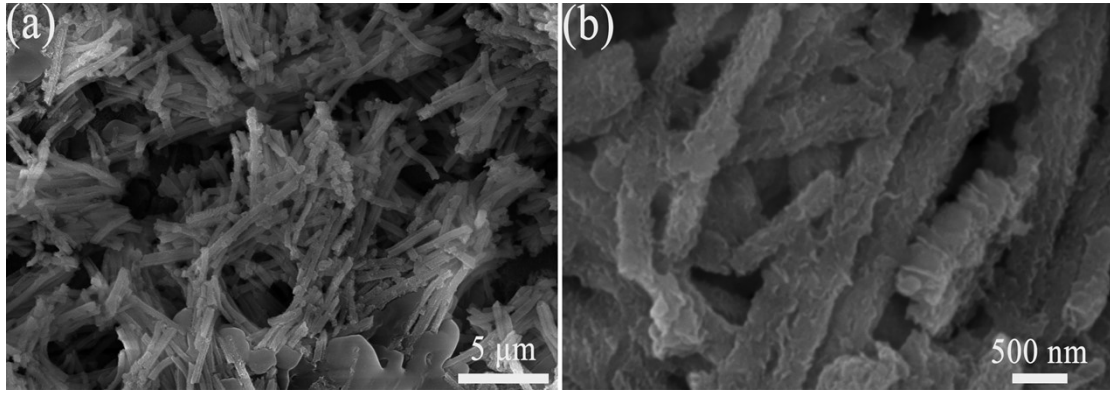

Fig. S5. Low-magnification (a) and High-magnification (b) SEM image of NiFe LDH<sub>30min</sub>@S-NiMoO<sub>4</sub>.

## References

- (1) Y. Wang, L. Zhao, X. Sui, D. Gu and Z. Wang, *Ceramics International*, 2019, **45**, 17128-17136.
- (2) J. Chen, G. Zhao, Y. Chen, K. Rui, H. Mao, S. X. Dou and W. Sun, *Chemistry*, 2019, **25**, 280-284.
- (3) H. Hao, Y. Li, Y. Wu, Z. Wang, M. Yuan, J. Miao, Z. Lv, L. Xu and B. Wei, *Materials Today Energy*, 2022, **23**, 100887.
- (4) Y. Zhang, H. Guo, J. Ren, X. Li, W. Ren and R. Song, *Applied Catalysis B: Environmental*, 2021, **298**, 120582.
- (5) L. An, J. Feng, Y. Zhang, R. Wang, H. Liu, G. C. Wang, F. Cheng and P. Xi, *Advanced Functional Materials*, 2019, **29**, 1805298.
- (6) L. Chen, Z. Deng, Z. Chen and X. Wang, *Advanced Materials Interfaces*, 2021, **8**, 2101483.
- (7) N. Xu, W. Peng, L. Lv, P. Xu, C. Wang, J. Li, W. Luo and L. Zhou, *Materials*, 2022, **15**, 3688.
- (8) G. Solomon, A. Landström, R. Mazzaro, M. Jugovac, P. Moras, E. Cattaruzza, V. Morandi, I. Concina and A. Vomiero, *Advanced Energy Materials*, 2021, **11**, 2101324.
- (9) Z. Zhang, S. Ye, J. Ji, Z. Li and F. Wang, *Colloids and Surfaces A: Physicochemical and Engineering Aspects*, 2020, **599**, 124888.
- (10) S. Zhuang, S. Tong, H. Wang, H. Xiong, Y. Gong, Y. Tang, J. Liu, Y. Chen and P. Wan, *International Journal of Hydrogen Energy*, 2019, **44**, 24546-24558.
- (11) W. Xi, G. Yan, H. Tan, L. Xiao, S. Cheng, S. U. Khan, Y. Wang and Y. Li, *Dalton Transactions*, 2018, **47**, 8787-8793.
- (12) Karmakar, K. Karthick, S. S. Sankar, S. Kumaravel, M. Ragunath and S. Kundu, *Journal of Materials Chemistry A*, 2021, **9**, 11691-11704.
- (13) F. Wang, Z. Liu, K. Zhang, Q. Zha and Y. Ni, *Dalton Transactions*, 2021, **50**, 17774-17784.
- (14) L. Jin, Q. Wang, K. Wang, Y. Lu, B. Huang, H. Xu, X. Qian, L. Yang, G. He and H. Chen, *Dalton Transactions*, 2022, **51**, 6448-6453.
- (15) J. Choi, D. Kim, W. Zheng, B. Yan, Y. Li, L. Y. S. Lee and Y. Piao, *Applied Catalysis B: Environmental*, 2021, **286**, 119857.
- (16) J. Wang, J. Hu, S. Niu, S. Li, Y. Du and P. Xu, *Small*, 2022, **18**, 2105972.
